# Supplementary material for: Oxidative and salt stresses alter the 26S proteasome holoenzyme and associated protein profiles in Arabidopsis thaliana
Source: BMC Plant Biol. 2021 Oct 25;21:486. doi: 10.1186/s12870-021-03234-9 (PMC8543921; doi:10.1186/s12870-021-03234-9)
Supplement: Supplementary file 4 — Additional file 4: Table 4. Short summary of proteasome associated regulator proteins and molecular chaperones. [file 12870_2021_3234_MOESM4_ESM.xlsx]

## Sheet: Sheet1
		Normalized Total Spectrum Count (*AvgSpec/SampleSpec)								Total Spectra Per PAP Class
		C+ATP	MV+ATP	NaCl+ATP	C-ATP	MV-ATP	NaCl-ATP			C+ATP	MV+ATP	NaCl+ATP	C-ATP	MV-ATP	NaCl-ATP
PA200	AT3G13330	22.1929	30.7956	9.46055	88.6362	83.5785	53.5723		PA200	22.1929	30.7956	9.46055	88.6362	83.5785	53.5723
PTRE1	AT3G53970	3.02631	3.42173	0	2.81385	4.28608	3.51294		PTRE1	3.02631	3.42173	0	2.81385	4.28608	3.51294
PBAC1	AT3G25545	16.1403	15.3978	5.67633	16.8831	13.9297	7.90411		PBACs/PAP1	41.3595	37.639	14.1908	42.2077	37.5032	20.1994
PBAC2	AT3G18940	15.1315	11.1206	5.67633	9.84847	9.64367	8.78235		UMP1	13.114	11.9761	4.73028	14.0692	10.7152	5.26941
PBAC3	AT5G14710	1.00877	2.5663	0.946055	5.62769	3.21456	0		HSC/HSP70s	8.07015	13.6869	17.975	151.948	77.1494	194.968
PBAC4	AT1G48170	8.07015	6.84346	1.89211	8.44154	8.57215	2.6347
UMP1a	AT1G67250	13.114	11.9761	4.73028	14.0692	10.7152	5.26941
PAP1	AT3G07640	1.00877	1.71086	0	1.40692	2.14304	0.878235
HSC70-1	AT5G02500	8.07015	8.55432	11.3527	52.0562	28.931	67.6241
HSC70-2	AT5G02490	0	0	0	26.7316	13.9297	43.9117
HSC70-3	AT3G09440	0	5.13259	6.62239	36.58	16.0728	44.79
HSP70	AT3G12580	0	0	0	36.58	18.2158	38.6423
HSP81-3, HSP81-2	AT5G56010, AT5G56030	6.05262	3.42173	9.46055	2.81385	1.07152	0
PAG1	AT2G27020	102.894	116.339	99.3358	208.225	195.016	186.186
